# Supplementary material for: Ambient air pollution and risk of respiratory infection among adults: evidence from the multiethnic study of atherosclerosis (MESA)
Source: HighWire-hosted journal article supplement (doi:10.1136/bmjresp-2020-000866), 2021-03-01
Supplement: bmjresp-2020-000866supp001_data_supplement.pdf [file bmjresp-2020-000866supp001_data_supplement.pdf]

**Ambient air pollution and risk of respiratory infection among adults: Evidence from the Multi-Ethnic Study of Atherosclerosis**

Kipruto Kirwa, Carly M Eckert, Sverre Vedal, Anjum Hajat, Joel D Kaufman

Online Supplementary Data

Table S1. Baseline characteristics of study participants followed-up in the Multi-Ethnic Study of Atherosclerosis (MESA), by contribution to all study visits.\*

| Characteristic         | Participants contributing to analysis at all visits<br><i>n</i> = 4,197 | Participants who dropped out during follow-up or were ineligible for analysis on at least one examination<br><i>n</i> = 2,339 |
|------------------------|-------------------------------------------------------------------------|-------------------------------------------------------------------------------------------------------------------------------|
| Age (years), mean (SD) | 60.3 (9.6)                                                              | 65.1 (10.7)                                                                                                                   |
| Study region           |                                                                         |                                                                                                                               |
| Winston-Salem          | 698 (16.6)                                                              | 318 (13.6)                                                                                                                    |
| New York City          | 743 (17.7)                                                              | 323 (13.8)                                                                                                                    |
| Baltimore              | 567 (13.5)                                                              | 455 (19.5)                                                                                                                    |
| St. Paul               | 688 (16.4)                                                              | 345 (14.7)                                                                                                                    |
| Chicago                | 812 (19.3)                                                              | 318 (13.6)                                                                                                                    |
| Los Angeles            | 689 (16.4)                                                              | 580 (24.8)                                                                                                                    |
| Race                   |                                                                         |                                                                                                                               |
| White                  | 1,717 (40.9)                                                            | 799 (34.2)                                                                                                                    |
| Chinese-American       | 498 (11.9)                                                              | 289 (12.4)                                                                                                                    |
| African-American       | 1,099 (26.2)                                                            | 687 (29.4)                                                                                                                    |
| Hispanic               | 883 (21.0)                                                              | 564 (24.1)                                                                                                                    |
| Sex                    |                                                                         |                                                                                                                               |
| Female                 | 2,197 (52.3)                                                            | 1,248 (53.4)                                                                                                                  |
| Male                   | 2,000 (47.7)                                                            | 1,091 (46.6)                                                                                                                  |
| Education level        |                                                                         |                                                                                                                               |

|                                               |              |              |
|-----------------------------------------------|--------------|--------------|
| Less than high school                         | 579 (13.8)   | 590 (25.2)   |
| High school                                   | 725 (17.3)   | 462 (19.8)   |
| Some college or technical certificate         | 1,215 (28.9) | 643 (27.5)   |
| College or graduate degree                    | 1,678 (40.0) | 644 (27.5)   |
| Married/living with a partner                 | 2,644 (63.0) | 1,303 (55.7) |
| Body mass index, mean (SD)                    | 28.3 (5.3)   | 28.4 (5.7)   |
| Ever smoked                                   | 2,222 (52.9) | 1,263 (54.0) |
| Current smoker                                | 420 (10.0)   | 321 (13.9)   |
| Employed                                      | 2,055 (49.0) | 783 (33.5)   |
| Annual family income, US dollars              |              |              |
| <20,000                                       | 801 (19.2)   | 796 (34.4)   |
| 20,000-39,999                                 | 1,083 (26.0) | 673 (29.1)   |
| 40,000-74,999                                 | 1,150 (27.6) | 503 (21.8)   |
| ≥75,000                                       | 1,134 (27.2) | 340 (14.7)   |
| Own home or pay mortgage (not rent)           | 2,968 (70.9) | 1,445 (62.1) |
| Excellent self-reported general health status | 906 (53.5)   | 559 (39.0)   |
| No health insurance                           | 241 (5.8)    | 223 (9.7)    |
| On Medicaid                                   | 322 (7.7)    | 294 (12.8)   |
| Diabetic per ADA 2003 criteria                | 599 (14.3)   | 453 (19.4)   |
| Has metabolic syndrome                        | 1,504 (35.9) | 981 (42.0)   |

|                                                                      |                     |                     |
|----------------------------------------------------------------------|---------------------|---------------------|
| Moderate and vigorous physical activity, Met Mins/Week, median (IQR) | 4,219 (2,160–7,410) | 3,330 (1,508–6,375) |
| Intentional physical activity, Met Mins/Week, median (IQR)           | 840 (210–2,062)     | 712 (0–1,800)       |
| Self-reported emphysema                                              | 23 (0.5)            | 50 (2.1)            |
| Self-reported asthma                                                 | 136 (3.2)           | 117 (5.0)           |

\* Units are *n* (%) unless otherwise specified. ADA – American Diabetic Association, IQR – Interquartile range, SD – Standard Deviation

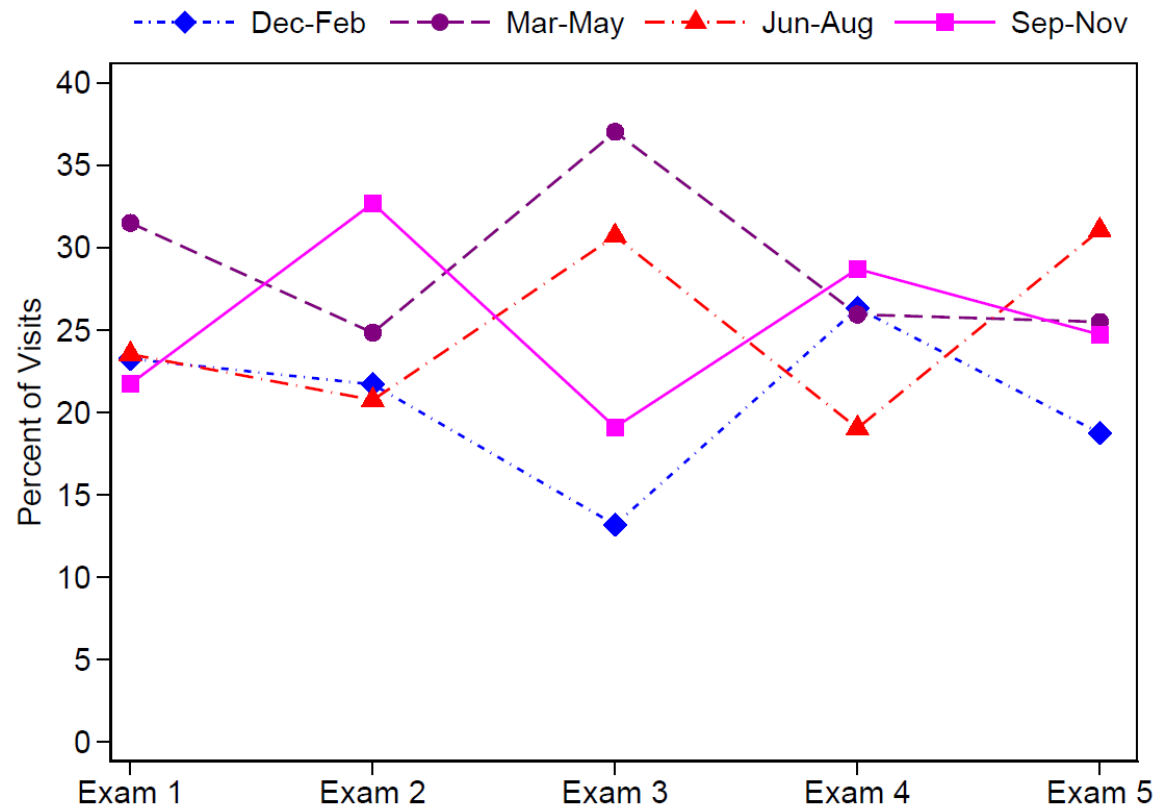

Figure S1. Distribution of study examinations per season in MESA.

Table S2. Risk ratios (95% CIs) for associations between respiratory infection and average exposure to PM<sub>2.5</sub>, NO<sub>x</sub>, and NO<sub>2</sub> among MESA participants, for entire study duration and per study exam.

| Pollutant         | Examination   | Annual average    |         | 28-day average    |         | 14-day average    |         |
|-------------------|---------------|-------------------|---------|-------------------|---------|-------------------|---------|
|                   |               | RR (95% CI)       | p-value | RR (95% CI)       | p-value | RR (95% CI)       | p-value |
| PM <sub>2.5</sub> | Overall (1–5) | 1.00 (0.94, 1.07) | 0.980   | 1.04 (1.00, 1.09) | 0.078   | 1.03 (0.99, 1.08) | 0.102   |
|                   | 1             | 1.13 (1.01, 1.28) | 0.038   | 1.09 (0.99, 1.19) | 0.075   | 1.05 (0.97, 1.14) | 0.220   |
|                   | 2             | 1.00 (0.86, 1.15) | 0.957   | 1.01 (0.90, 1.12) | 0.926   | 1.00 (0.92, 1.10) | 0.925   |
|                   | 3             | 0.89 (0.80, 1.00) | 0.047   | 0.99 (0.89, 1.10) | 0.878   | 0.98 (0.89, 1.07) | 0.620   |
|                   | 4             | 1.12 (0.99, 1.27) | 0.074   | 1.09 (0.96, 1.23) | 0.195   | 1.10 (0.99, 1.24) | 0.087   |
|                   | 5             | 1.03 (0.91, 1.17) | 0.666   | 1.00 (0.85, 1.18) | 0.997   | 1.00 (0.86, 1.16) | 0.979   |
| NO <sub>x</sub>   | Overall (1–5) | 1.04 (0.95, 1.14) | 0.405   | 1.15 (1.10, 1.20) | 0.000   | 1.12 (1.08, 1.16) | 0.000   |
|                   | 1             | 1.05 (0.88, 1.27) | 0.578   | 1.11 (1.02, 1.20) | 0.012   | 1.08 (1.00, 1.17) | 0.046   |
|                   | 2             | 1.17 (0.96, 1.42) | 0.126   | 1.17 (1.06, 1.30) | 0.003   | 1.12 (1.02, 1.23) | 0.022   |
|                   | 3             | 0.90 (0.75, 1.09) | 0.278   | 1.06 (0.94, 1.20) | 0.314   | 1.05 (0.95, 1.17) | 0.338   |
|                   | 4             | 1.20 (0.98, 1.47) | 0.076   | 1.12 (1.00, 1.24) | 0.048   | 1.10 (0.99, 1.22) | 0.073   |
|                   | 5             | 1.10 (0.88, 1.38) | 0.404   | 1.02 (0.85, 1.22) | 0.843   | 1.02 (0.86, 1.21) | 0.816   |
| NO <sub>2</sub>   | Overall (1–5) | 1.07 (0.94, 1.22) | 0.301   | 1.21 (1.10, 1.33) | 0.000   | 1.15 (1.05, 1.25) | 0.002   |
|                   | 1             | 1.08 (0.84, 1.39) | 0.567   | 1.09 (0.90, 1.31) | 0.394   | 1.03 (0.87, 1.22) | 0.761   |
|                   | 2             | 1.31 (0.98, 1.73) | 0.064   | 1.21 (1.00, 1.47) | 0.051   | 1.12 (0.93, 1.34) | 0.226   |
|                   | 3             | 0.95 (0.75, 1.21) | 0.694   | 1.07 (0.88, 1.31) | 0.490   | 1.04 (0.87, 1.25) | 0.650   |
|                   | 4             | 1.19 (0.92, 1.52) | 0.180   | 1.21 (0.99, 1.48) | 0.066   | 1.15 (0.95, 1.40) | 0.154   |
|                   | 5             | 1.04 (0.78, 1.40) | 0.769   | 1.07 (0.81, 1.42) | 0.610   | 1.07 (0.82, 1.39) | 0.626   |

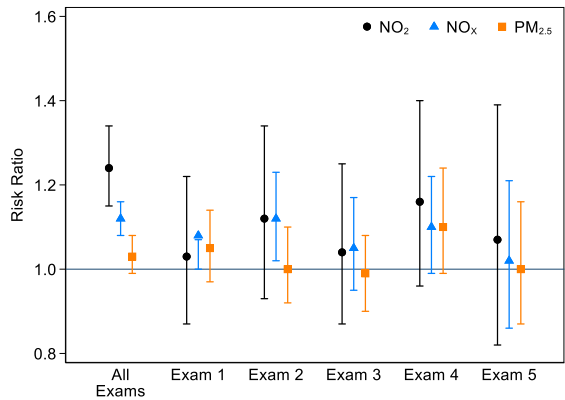

Figure S2. Risk ratios and 95% confidence intervals for associations between respiratory infection and pollutant exposure in the two to four week period before a study examination, for an interquartile range increase in average pollutant exposure. Results are from a model adjusted for study site, race/ethnicity, sex, age, body mass index, marital status, education level, smoking status (ever/never smoked), employment status, annual income, neighborhood level socio-economic index, home ownership, number of household members, having health insurance, whether on Medicaid, diabetes diagnosis based on ADA criteria and natural cubic splines of temperature and relative humidity (four degrees of freedom).

Table S3. Risk ratios (95% CIs) of respiratory infection for an interquartile range increase in average air pollutant exposure in the two-to-six week period before interview among participants in the MESA study, stratified by select characteristics.

| Characteristic                     | PM <sub>2.5</sub>   |         | NO <sub>x</sub>     |         | NO <sub>2</sub>     |         |
|------------------------------------|---------------------|---------|---------------------|---------|---------------------|---------|
|                                    | Risk ratio (95% CI) | p-value | Risk ratio (95% CI) | p-value | Risk ratio (95% CI) | p-value |
| Age (years)                        |                     | 0.522   |                     | 0.428   |                     | 0.494   |
| Less than 65                       | 1.03 (0.97, 1.10)   |         | 1.13 (1.06, 1.20)   |         | 1.16 (1.02, 1.32)   |         |
| 65 or more                         | 1.05 (0.99, 1.12)   |         | 1.18 (1.11, 1.24)   |         | 1.26 (1.11, 1.44)   |         |
| Race/ethnicity                     |                     | 0.853   |                     | 0.141   |                     | 0.431   |
| White                              | 1.01 (0.93, 1.10)   |         | 1.19 (1.08, 1.32)   |         | 1.14 (0.98, 1.33)   |         |
| Chinese American                   | 1.16 (0.94, 1.43)   |         | 1.25 (1.07, 1.46)   |         | 1.37 (1.04, 1.80)   |         |
| African American                   | 1.01 (0.94, 1.08)   |         | 1.10 (1.01, 1.20)   |         | 1.16 (0.98, 1.38)   |         |
| Hispanic                           | 1.06 (0.97, 1.17)   |         | 1.14 (1.04, 1.24)   |         | 1.13 (0.93, 1.36)   |         |
| Sex                                |                     | 0.148   |                     | 0.688   |                     | 0.861   |
| Female                             | 1.05 (0.99, 1.11)   |         | 1.13 (1.07, 1.19)   |         | 1.16 (1.03, 1.31)   |         |
| Male                               | 1.03 (0.95, 1.10)   |         | 1.18 (1.10, 1.26)   |         | 1.26 (1.09, 1.46)   |         |
| Ever smoked                        |                     | 0.494   |                     | 0.893   |                     | 0.370   |
| No                                 | 1.06 (0.99, 1.13)   |         | 1.16 (1.09, 1.23)   |         | 1.16 (1.01, 1.33)   |         |
| Yes                                | 1.03 (0.97, 1.09)   |         | 1.14 (1.08, 1.21)   |         | 1.25 (1.10, 1.42)   |         |
| Diabetic                           |                     | 0.137   |                     | 0.133   |                     | 0.283   |
| No                                 | 1.05 (1.00, 1.11)   |         | 1.17 (1.12, 1.23)   |         | 1.23 (1.11, 1.36)   |         |
| Yes                                | 1.00 (0.90, 1.11)   |         | 1.07 (0.96, 1.19)   |         | 1.14 (0.89, 1.45)   |         |
| Metabolic syndrome                 |                     | 0.161   |                     | 0.279   |                     | 0.695   |
| No                                 | 1.07 (1.01, 1.13)   |         | 1.18 (1.12, 1.24)   |         | 1.21 (1.08, 1.36)   |         |
| Yes                                | 1.01 (0.94, 1.08)   |         | 1.12 (1.05, 1.19)   |         | 1.19 (1.03, 1.38)   |         |
| Neighborhood SES index at baseline |                     | 0.997   |                     | 0.237   |                     | 0.378   |
| ≤0                                 | 1.02 (0.94, 1.10)   |         | 1.16 (1.06, 1.27)   |         | 1.15 (0.99, 1.32)   |         |
| >0                                 | 1.05 (0.99, 1.11)   |         | 1.15 (1.10, 1.21)   |         | 1.25 (1.11, 1.42)   |         |
| Education level                    |                     | 0.715   |                     | 0.212   |                     | 0.843   |
| Less than high school              | 1.06 (0.96, 1.16)   |         | 1.10 (1.01, 1.20)   |         | 1.04 (0.87, 1.26)   |         |
| High school                        | 1.02 (0.92, 1.14)   |         | 1.23 (1.11, 1.36)   |         | 1.23 (0.96, 1.56)   |         |
| Some college                       | 1.03 (0.94, 1.12)   |         | 1.12 (1.04, 1.21)   |         | 1.23 (1.03, 1.47)   |         |
| College or graduate                | 1.05 (0.97, 1.14)   |         | 1.21 (1.11, 1.32)   |         | 1.27 (1.09, 1.47)   |         |
| Household income, US dollars       |                     | 0.418   |                     | 0.175   |                     | 0.419   |
| < 20,000                           | 1.06 (0.97, 1.15)   |         | 1.10 (1.03, 1.18)   |         | 1.12 (0.95, 1.32)   |         |
| 20,000 – 39,999                    | 1.08 (0.98, 1.17)   |         | 1.20 (1.10, 1.31)   |         | 1.19 (0.97, 1.46)   |         |
| 40,000 – 74,999                    | 0.96 (0.88, 1.05)   |         | 1.14 (1.04, 1.26)   |         | 1.22 (1.02, 1.46)   |         |
| ≥ 75,000                           | 1.05 (0.94, 1.16)   |         | 1.19 (1.06, 1.34)   |         | 1.18 (0.99, 1.42)   |         |



Table S4. Risk ratios and 95% CIs of respiratory infection for an interquartile range increase in pollutant exposure, stratified by influenza activity-week threshold, based on data from the Los Angeles study area\*

| Characteristic               | Number of participants | Number of visits | Risk ratio (95% CI) | p-value |
|------------------------------|------------------------|------------------|---------------------|---------|
| Long-term (1-year) exposure  |                        |                  |                     |         |
| PM <sub>2.5</sub>            |                        |                  |                     | 0.412   |
| Flu week                     | 607                    | 702              | 1.03 (0.83, 1.28)   |         |
| Non-flu week                 | 607                    | 702              | 1.13 (0.49, 2.62)   |         |
| NO <sub>x</sub>              |                        |                  |                     | 0.479   |
| Flu week                     | 607                    | 702              | 1.11 (0.90, 1.38)   |         |
| Non-flu week                 | 607                    | 702              | 1.26 (0.79, 2.02)   |         |
| NO <sub>2</sub>              |                        |                  |                     | 0.472   |
| Flu week                     | 607                    | 702              | 1.06 (0.88, 1.28)   |         |
| Non-flu week                 | 607                    | 702              | 1.12 (0.80, 1.57)   |         |
| Short-term (4-week) exposure |                        |                  |                     |         |
| PM <sub>2.5</sub>            |                        |                  |                     | 0.088   |
| Flu week                     | 608                    | 703              | 1.01 (0.93, 1.10)   |         |
| Non-flu week                 | 608                    | 703              | 1.05 (0.78, 1.41)   |         |
| NO <sub>x</sub>              |                        |                  |                     | 0.137   |
| Flu week                     | 608                    | 703              | 1.08 (0.94, 1.24)   |         |
| Non-flu week                 | 608                    | 703              | 1.11 (0.92, 1.35)   |         |
| NO <sub>2</sub>              |                        |                  |                     | 0.161   |
| Flu week                     | 608                    | 703              | 1.09 (0.95, 1.25)   |         |
| Non-flu week                 | 608                    | 703              | 1.18 (0.90, 1.55)   |         |
| Short-term (2-week) exposure |                        |                  |                     |         |
| PM <sub>2.5</sub>            |                        |                  |                     | 0.135   |
| Flu week                     | 608                    | 703              | 1.01 (0.88, 1.15)   |         |
| Non-flu week                 | 608                    | 703              | 1.02 (0.80, 1.30)   |         |
| NO <sub>x</sub>              |                        |                  |                     | 0.161   |
| Flu week                     | 608                    | 703              | 1.06 (0.95, 1.19)   |         |
| Non-flu week                 | 608                    | 703              | 1.10 (0.91, 1.33)   |         |
| NO <sub>2</sub>              |                        |                  |                     | 0.149   |
| Flu week                     | 608                    | 703              | 1.07 (0.94, 1.22)   |         |
| Non-flu week                 | 608                    | 703              | 1.15 (0.88, 1.49)   |         |

\* Flu week is defined as periods of two or more consecutive weeks in which each week accounted for more than 2% of the season's total number of specimens that tested positive for influenza in public health laboratories.

Table S5. Risk ratios and 95% CIs of respiratory infection during high versus low influenza activity weeks, stratified by exposure to lower or higher than median pollutant levels in the two-to-six weeks prior to study examination, based on data from the Los Angeles study area \*

| Characteristic    | Risk ratio (95% CI) | p-value |
|-------------------|---------------------|---------|
| PM <sub>2.5</sub> |                     | 0.263   |
| Above median      | 3.76 (1.56, 9.10)   |         |
| Below median      | 0.91 (0.15, 5.57)   |         |
| NO <sub>2</sub>   |                     | 0.298   |
| Above median      | 3.31 (1.39, 7.89)   |         |
| Below median      | 0.79 (0.12, 5.28)   |         |

\* Median pollutant concentrations for the period when influenza activity data were available were 11.4  $\mu\text{g}/\text{m}^3$  for PM<sub>2.5</sub> and 24.9 ppb for NO<sub>2</sub> in Los Angeles. Model convergence was not achieved for NO<sub>x</sub>. Periods meeting influenza activity thresholds are defined by the Centers for Disease Control as two or more consecutive weeks in which each week accounted for more than 2% of the season's total number of specimens that tested positive for influenza in public health laboratories. P-value corresponds to a joint Wald test of equality of coefficients across strata of variable.

Table S6. Risk ratios (95% CIs) for associations between respiratory infection and average exposure to PM<sub>2.5</sub>, NO<sub>x</sub>, and NO<sub>2</sub> among 4,197 MESA participants who were evaluated at all five study examinations, for entire study duration and per study exam.

| Pollutant         | Examination   | Annual average    |         | 28-day average    |         | 14-day average    |         |
|-------------------|---------------|-------------------|---------|-------------------|---------|-------------------|---------|
|                   |               | RR (95% CI)       | p-value | RR (95% CI)       | p-value | RR (95% CI)       | p-value |
| PM <sub>2.5</sub> | Overall (1–5) | 0.99 (0.91, 1.08) | 0.844   | 1.03 (0.97, 1.09) | 0.342   | 1.03 (0.98, 1.09) | 0.190   |
|                   | 1             | 1.12 (0.98, 1.28) | 0.088   | 1.07 (0.94, 1.21) | 0.300   | 1.07 (0.96, 1.19) | 0.240   |
|                   | 2             | 0.94 (0.80, 1.11) | 0.486   | 0.98 (0.86, 1.12) | 0.803   | 0.99 (0.89, 1.11) | 0.865   |
|                   | 3             | 0.92 (0.81, 1.05) | 0.226   | 1.01 (0.89, 1.15) | 0.862   | 1.00 (0.89, 1.12) | 0.989   |
|                   | 4             | 1.17 (1.02, 1.34) | 0.029   | 1.09 (0.95, 1.26) | 0.229   | 1.13 (1.00, 1.29) | 0.054   |
|                   | 5             | 1.01 (0.89, 1.15) | 0.860   | 0.97 (0.82, 1.15) | 0.753   | 0.97 (0.83, 1.13) | 0.660   |
| NO <sub>x</sub>   | Overall (1–5) | 1.03 (0.93, 1.15) | 0.555   | 1.13 (1.08, 1.20) | 0.000   | 1.11 (1.05, 1.16) | 0.000   |
|                   | 1             | 1.10 (0.87, 1.38) | 0.426   | 1.11 (0.99, 1.24) | 0.073   | 1.12 (1.02, 1.24) | 0.024   |
|                   | 2             | 1.11 (0.86, 1.43) | 0.414   | 1.14 (1.00, 1.30) | 0.053   | 1.06 (0.93, 1.19) | 0.396   |
|                   | 3             | 0.93 (0.74, 1.16) | 0.506   | 1.07 (0.93, 1.24) | 0.354   | 1.03 (0.91, 1.18) | 0.618   |
|                   | 4             | 1.27 (1.02, 1.58) | 0.035   | 1.10 (0.97, 1.25) | 0.143   | 1.08 (0.95, 1.22) | 0.222   |
|                   | 5             | 1.08 (0.85, 1.37) | 0.515   | 1.03 (0.85, 1.24) | 0.780   | 1.02 (0.85, 1.22) | 0.847   |
| NO <sub>2</sub>   | Overall (1–5) | 1.08 (0.93, 1.26) | 0.319   | 1.20 (1.07, 1.34) | 0.002   | 1.14 (1.02, 1.26) | 0.016   |
|                   | 1             | 1.07 (0.78, 1.47) | 0.671   | 1.05 (0.82, 1.34) | 0.698   | 1.09 (0.87, 1.35) | 0.466   |
|                   | 2             | 1.30 (0.91, 1.86) | 0.154   | 1.20 (0.93, 1.54) | 0.155   | 1.06 (0.84, 1.33) | 0.645   |
|                   | 3             | 1.02 (0.77, 1.36) | 0.888   | 1.12 (0.88, 1.42) | 0.360   | 1.05 (0.84, 1.30) | 0.679   |
|                   | 4             | 1.34 (1.02, 1.76) | 0.034   | 1.28 (1.02, 1.60) | 0.030   | 1.20 (0.97, 1.48) | 0.091   |
|                   | 5             | 1.01 (0.74, 1.37) | 0.961   | 1.07 (0.80, 1.43) | 0.658   | 1.04 (0.78, 1.37) | 0.798   |

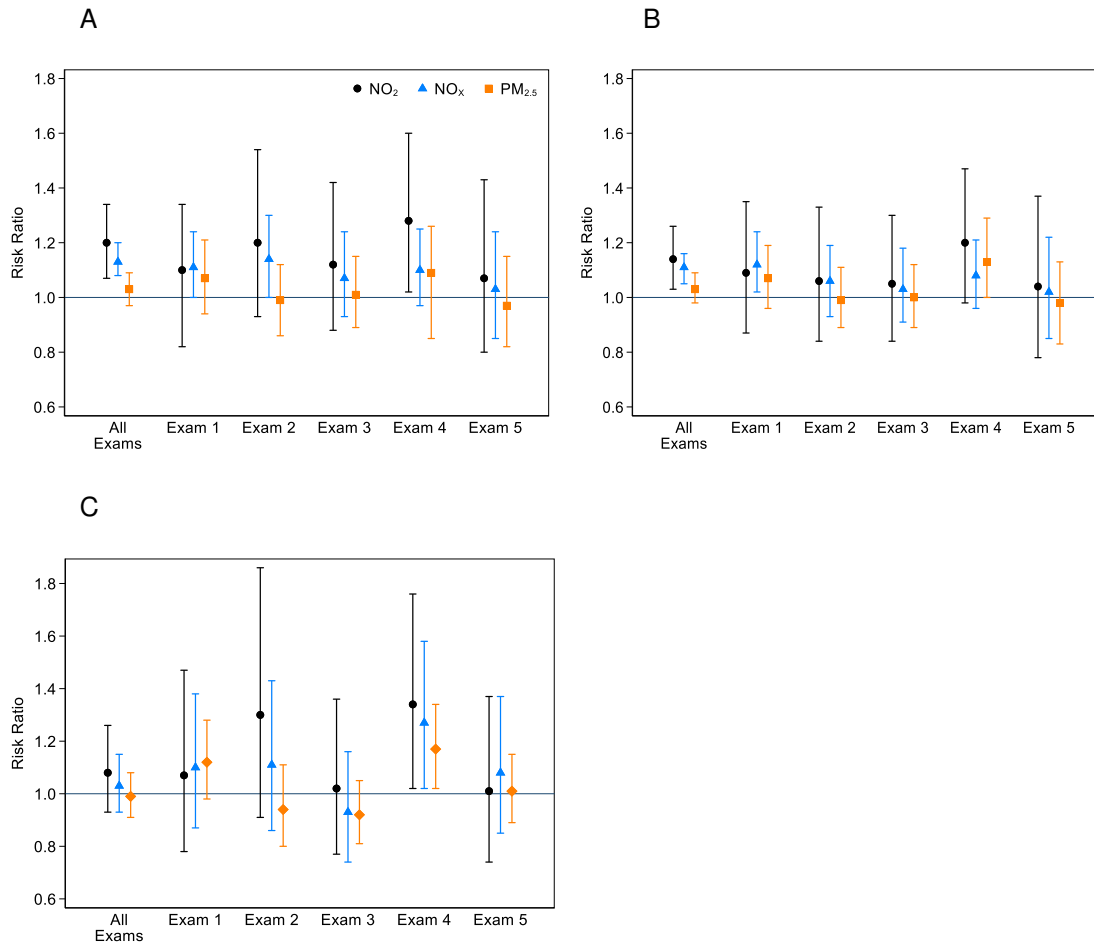

Figure S3. Risk ratios and 95% confidence intervals for associations between respiratory infection and pollutant exposure among 4,197 MESA participants who were evaluated at all five study examinations, in the two-to-six weeks (A), two-to-four weeks (B), and year (C) prior to study visit, for an interquartile range increase in average pollutant exposure.

Table S7. Risk ratios and 95% confidence intervals for associations between respiratory infection and pollutant exposure in the two-to-six weeks before study examination when excluding report of febrile illness from the outcome definition, for an interquartile range increase in average pollutant exposure.

| Pollutant         | Risk ratio<br>(95% CI)  |                           |
|-------------------|-------------------------|---------------------------|
|                   | Main result in Figure 4 | Excluding febrile illness |
| PM <sub>2.5</sub> | 1.04 (1.00, 1.09)       | 1.04 (0.99, 1.09)         |
| NO <sub>x</sub>   | 1.15 (1.10, 1.20)       | 1.15 (1.10, 1.20)         |
| NO <sub>2</sub>   | 1.21 (1.10, 1.33)       | 1.21 (1.10, 1.33)         |
